# Supplementary material for: Dietary Patterns During Adolescence and Risk of Type 2 Diabetes in Middle-Aged Women
Source: Oxford University Press journal article supplement (doi:10.2337/dc11-0386), 2011-11-11
Supplement: dc110386supplementarydata.pdf [file dc110386supplementarydata.pdf]

SUPPLEMENTARY DATA

**Supplementary Table 1.** Factor Loadings for Food Groups of the 2 Major Dietary Patterns Identified from the NHS-2 High School FFQ

| Food Groups             | Dietary Pattern |         |
|-------------------------|-----------------|---------|
|                         | Prudent         | Western |
| Other vegetables        | 0.77            | .       |
| Green, leafy vegetables | 0.72            | .       |
| Cruciferous vegetables  | 0.68            | .       |
| Yellow vegetables       | 0.67            | .       |
| Fruit                   | 0.65            | .       |
| Tomatoes                | 0.56            | .       |
| Legumes                 | 0.52            | 0.16    |
| Salad dressing          | 0.44            | 0.23    |
| Garlic                  | 0.42            | .       |
| Fruit juice             | 0.41            | .       |
| Better quality grains   | 0.39            | .       |
| Fish                    | 0.38            | 0.18    |
| Poultry                 | 0.31            | 0.18    |
| Potato salad            | 0.28            | 0.26    |
| Low fat dairy           | 0.26            | .       |
| Organ meats             | 0.20            | .       |
| Tea                     | .               | .       |
| Diet soda               | .               | .       |
| Coffee                  | .               | .       |
| Desserts and Sweets     | .               | 0.62    |
| Condiments              | .               | 0.61    |
| Snacks                  | 0.19            | 0.58    |
| Processed meat          | .               | 0.56    |
| Fries                   | .               | 0.55    |
| Refined grains          | .               | 0.53    |
| Red meat                | .               | 0.52    |
| Mayonnaise              | 0.19            | 0.44    |
| Nuts/ peanut butter     | 0.26            | 0.42    |
| High fat dairy          | .               | 0.41    |
| Soda                    | -0.16           | 0.40    |
| Pizza                   | .               | 0.37    |
| Potato (mashed, boiled) | .               | 0.33    |
| Eggs                    | .               | 0.31    |
| Margarine               | .               | 0.26    |
| Butter                  | .               | 0.22    |
| Cream soup (chowder)    | 0.16            | 0.18    |
| Iced tea                | .               | 0.17    |
| Cereal                  | .               | .       |

Factor Loadings are identical to Pearson Correlation coefficients. Factor loadings with absolute values <0.15 are not shown for simplicity. Food groups with absolute factor loadings  $\geq 0.30$  are considered as significantly contributing to the pattern.

SUPPLEMENTARY DATA

**Supplementary Table 2.** Factor loadings for food groups of the 2 major dietary patterns identified from FFQ's in 1991, 1995, 1999 and 2003 in women of the NHS2

| Food Groups            | Dietary Patterns |         |         |         |         |         |         |         |
|------------------------|------------------|---------|---------|---------|---------|---------|---------|---------|
|                        | 1991             |         | 1995    |         | 1999    |         | 2003    |         |
|                        | Prudent          | Western | Prudent | Western | Prudent | Western | Prudent | Western |
| Other vegetables       | 0.70             | 0.20    | 0.71    | 0.17    | 0.69    | 0.17    | 0.72    | 0.26    |
| Leafy green vegetables | 0.70             | .       | 0.68    | .       | 0.62    | .       | 0.69    | 0.22    |
| Yellow vegetables      | 0.66             | .       | 0.61    | .       | 0.56    | .       | 0.60    | 0.18    |
| Fruit                  | 0.63             | .       | 0.61    | .       | 0.61    | .       | 0.67    | 0.23    |
| Cruciferous vegetables | 0.60             | .       | 0.60    | .       | 0.59    | .       | 0.65    | 0.17    |
| Tomatoes               | 0.55             | 0.19    | 0.55    | 0.18    | 0.45    | 0.36    | 0.56    | 0.43    |
| Legumes                | 0.53             | 0.20    | 0.55    | .       | 0.50    | .       | 0.58    | 0.15    |
| Fish                   | 0.48             | .       | 0.42    | 0.16    | 0.45    | .       | 0.61    | 0.19    |
| Poultry                | 0.44             | .       | 0.27    | 0.25    | 0.30    | 0.28    | 0.46    | 0.44    |
| Salad dressing         | 0.37             | .       | 0.40    | .       | 0.38    | 0.17    | 0.52    | 0.25    |
| Water                  | 0.36             | .       | 0.36    | .       | 0.38    | .       | 0.58    | 0.29    |
| Olive oil              | 0.36             | .       | 0.35    | .       | 0.47    | .       | 0.59    | .       |
| Garlic                 | 0.35             | .       | 0.42    | .       | 0.45    | .       | 0.55    | .       |
| Whole grains           | 0.31             | .       | 0.29    | .       | 0.27    | .       | 0.47    | 0.34    |
| Low fat dairy          | 0.28             | .       | 0.24    | .       | 0.27    | .       | 0.37    | 0.36    |
| Juice                  | 0.26             | .       | 0.25    | .       | 0.21    | .       | 0.20    | 0.29    |
| Wine                   | .                | .       | 0.17    | .       | 0.19    | .       | 0.22    | .       |
| Coffee                 | .                | .       | .       | .       | .       | .       | 0.33    | 0.29    |
| Red meat               | .                | 0.65    | .       | 0.64    | .       | 0.62    | 0.22    | 0.69    |
| Processed meat         | .                | 0.60    | .       | 0.59    | .       | 0.55    | .       | 0.52    |
| French fries           | -0.16            | 0.57    | -0.19   | 0.56    | -0.20   | 0.53    | .       | 0.63    |
| Dessert                | .                | 0.50    | .       | 0.45    | .       | 0.41    | .       | 0.59    |
| Pizza                  | .                | 0.45    | .       | 0.44    | .       | 0.43    | .       | 0.58    |
| Potato                 | 0.17             | 0.43    | 0.20    | 0.40    | .       | 0.44    | 0.18    | 0.62    |
| Refined grains         | .                | 0.42    | .       | 0.37    | .       | 0.43    | 0.25    | 0.68    |
| Snack foods            | .                | 0.41    | .       | 0.39    | .       | 0.39    | .       | 0.58    |
| Eggs                   | .                | 0.40    | .       | 0.40    | .       | 0.32    | 0.32    | 0.32    |
| High fat dairy         | .                | 0.37    | .       | 0.35    | .       | 0.34    | 0.29    | 0.43    |
| Condiments             | .                | 0.35    | .       | 0.41    | .       | 0.43    | 0.27    | 0.50    |
| Sugary beverages       | .                | 0.35    | .       | 0.35    | -0.16   | 0.32    | .       | 0.42    |

SUPPLEMENTARY DATA

|            |      |      |      |      |      |      |      |      |
|------------|------|------|------|------|------|------|------|------|
| Mayonnaise | .    | 0.34 | 0.16 | 0.36 | 0.20 | 0.35 | 0.30 | 0.38 |
| Margarine  | .    | 0.34 | .    | 0.37 | .    | 0.32 | .    | 0.44 |
| Nuts       | 0.19 | 0.29 | .    | 0.25 | 0.25 | 0.18 | 0.44 | 0.20 |
| Cream soup | .    | 0.26 | .    | 0.32 | .    | 0.31 | .    | 0.43 |
| Butter     | .    | 0.23 | .    | 0.22 | .    | 0.21 | 0.18 | 0.29 |
| Tea        | .    | .    | .    | .    | 0.17 | .    | 0.33 | 0.18 |
| Diet soda  | .    | .    | .    | 0.15 | .    | 0.23 | .    | 0.36 |
| Beer       | .    | .    | .    | .    | .    | .    | .    | .    |
| Organ meat | .    | .    | .    | .    | .    | .    | .    | .    |
| Liquor     | .    | .    | .    | .    | .    | .    | .    | .    |
| Egg Whites | NA   | NA   | NA   | NA   | 0.18 | .    | 0.27 | .    |

Factor Loadings are identical to Pearson Correlation coefficients. Factor loadings with absolute values <0.15 are not shown for simplicity. Food groups with absolute factor loadings ≥0.30 are considered as significantly contributing to the pattern.

**Supplementary Table 3.** Association between High School Western Dietary Pattern and Risk of Type 2 Diabetes according to BMI at age 18 among NHS-2 participants

|                              | Quintile of High School Western Dietary Pattern |                   |                   |                   |                   | P trend |
|------------------------------|-------------------------------------------------|-------------------|-------------------|-------------------|-------------------|---------|
|                              | 1                                               | 2                 | 3                 | 4                 | 5                 |         |
| <b>BMI at age 18 &lt; 25</b> |                                                 |                   |                   |                   |                   |         |
| Number of cases              | 119                                             | 71                | 68                | 59                | 67                |         |
| Person years                 | 78344                                           | 46825             | 46753             | 46207             | 45012             |         |
| Model: RR (95% CI)*          | 1.00                                            | 1.20 (0.86, 1.68) | 0.99 (0.69, 1.40) | 1.34 (0.98, 1.83) | 1.41 (1.04, 1.91) | 0.02    |
| <b>BMI at age 18 ≥ 25</b>    |                                                 |                   |                   |                   |                   |         |
| Number of cases              | 47                                              | 39                | 20                | 35                | 25                |         |
| Person years                 | 8745                                            | 4738              | 4378              | 4776              | 4926              |         |
| Model: RR (95% CI)           | 1.00                                            | 0.78 (0.44, 1.39) | 1.15 (0.69, 1.91) | 0.71 (0.41, 1.23) | 0.95 (0.58, 1.55) | 0.69    |

\*Adjusted for: age, high school total energy, smoking and physical activity, adult physical activity, family history of diabetes, smoking status, postmenopausal hormone use, oral contraceptive use, total energy, alcohol intake, adult Western dietary pattern and weight change since age 18

p for interaction = 0.04

SUPPLEMENTARY DATA

**Supplementary Table 4.** Relative Risk of Type 2 Diabetes Among NHS-2 participants (1997-2005) According to quintile of Energy Adjusted Adult Dietary Pattern

|                        | Quintile of Dietary Pattern |                   |                   |                   |                   | P trend |
|------------------------|-----------------------------|-------------------|-------------------|-------------------|-------------------|---------|
|                        | 1                           | 2                 | 3                 | 4                 | 5                 |         |
| <b>Prudent Pattern</b> |                             |                   |                   |                   |                   |         |
| Number of cases        | 155                         | 105               | 86                | 105               | 99                | .       |
| Person years           | 58105                       | 58156             | 58128             | 58157             | 58157             | .       |
|                        |                             |                   |                   |                   |                   | .       |
| Model 1: RR (95% CI)   | 1.00                        | 0.66 (0.51, 0.85) | 0.51 (0.39, 0.67) | 0.59 (0.45, 0.75) | 0.52 (0.40, 0.67) | <.0001  |
| Model 2: RR (95% CI)   | 1.00                        | 0.81 (0.63, 1.04) | 0.70 (0.53, 0.92) | 0.87 (0.67, 1.12) | 0.85 (0.65, 1.11) | 0.32    |
| Model 3: RR (95% CI)   | 1.00                        | 0.87 (0.67, 1.13) | 0.74 (0.56, 0.98) | 0.87 (0.67, 1.13) | 0.84 (0.64, 1.11) | 0.24    |
| <b>Western Pattern</b> |                             |                   |                   |                   |                   |         |
| Number of cases        | 62                          | 89                | 96                | 113               | 190               | .       |
| Person Years           | 58251                       | 58158             | 58124             | 58156             | 58014             | .       |
|                        |                             |                   |                   |                   |                   | .       |
| Model 1: RR (95% CI)   | 1.00                        | 1.53 (1.11, 2.13) | 1.69 (1.22, 2.33) | 2.0 (1.46, 2.73)  | 3.32 (2.49, 4.43) | <.0001  |
| Model 2: RR (95% CI)   | 1.00                        | 1.36 (0.98, 1.88) | 1.37 (0.99, 1.90) | 1.49 (1.08, 2.04) | 2.14 (1.58, 2.88) | <.0001  |
| Model 3: RR (95% CI)   | 1.00                        | 1.18 (0.85, 1.65) | 1.07 (0.77, 1.49) | 1.04 (0.75, 1.43) | 1.24 (0.91, 1.69) | 0.23    |

Model 1: Adjusted for age, total energy

Model 2: Additional adjustment for physical activity, family history diabetes, smoking, hormone replacement therapy, oral contraceptive use, alcohol

Model 3: Additional adjustment for BMI

SUPPLEMENTARY DATA

**Supplementary Table 5.** Association between High School Dietary Patterns and Risk of Type 2 Diabetes according to age of participants at return of the HS-FFQ

|                                | Quintile of Dietary Pattern |                   |                   |                   |                   | P trend |
|--------------------------------|-----------------------------|-------------------|-------------------|-------------------|-------------------|---------|
|                                | 1                           | 2                 | 3                 | 4                 | 5                 |         |
| <b>Age at return of HS-FFQ</b> |                             |                   |                   |                   |                   |         |
| <b>Prudent Pattern</b>         |                             |                   |                   |                   |                   |         |
| Number of cases / Person years | 18/20931                    | 16/11894          | 7/12116           | 15/11695          | 11/12381          |         |
| < 40 years RR (95% CI)*        | 1.00                        | 2.11 (1.0, 4.45)  | 1.01 (0.39, 2.62) | 2.03 (0.94, 4.38) | 1.26 (0.54, 2.92) | 0.55    |
| Number of cases / Person years | 49/30074                    | 25/17665          | 21/17015          | 25/17132          | 23/17129          |         |
| 40 - 44 years RR (95% CI)      | 1.00                        | 1.07 (0.64, 1.80) | 0.96 (0.56, 1.66) | 0.97 (0.58, 1.62) | 1.11 (0.65, 1.89) | 0.82    |
| Number of cases / Person years | 65/27503                    | 52/16659          | 42/16228          | 41/16566          | 42/15151          |         |
| 45 - 49 years RR (95% CI)      | 1.00                        | 1.38 (0.94, 2.02) | 1.14 (0.77, 1.71) | 1.20 (0.80, 1.80) | 1.32 (0.88, 1.98) | 0.26    |
| Number of cases / Person years | 31/8619                     | 18/5390           | 17/5863           | 15/5590           | 17/5103           |         |
| ≥ 50 years RR (95% CI)         | 1.00                        | 1.09 (0.59, 2.01) | 0.92 (0.49, 1.73) | 0.94 (0.50, 1.79) | 1.12 (0.60, 2.09) | 0.86    |
| <b>Western Pattern</b>         |                             |                   |                   |                   |                   |         |
| Number of cases / Person years | 13/21858                    | 15/12601          | 17/11839          | 9/11392           | 13/11327          |         |
| < 40 years RR (95% CI)         | 1.00                        | 2.56 (1.13, 5.77) | 2.79 (1.25, 6.20) | 1.13 (0.45, 2.83) | 1.25 (0.53, 2.95) | 0.83    |
| Number of cases / Person years | 41/31097                    | 20/17954          | 22/17477          | 28/16654          | 32/15834          |         |
| 40 - 44 years RR (95% CI)      | 1.00                        | 0.89 (0.51, 1.57) | 1.00 (0.58, 1.75) | 1.08 (0.65, 1.79) | 0.97 (0.59, 1.58) | 0.95    |
| Number of cases / Person years | 54/25795                    | 34/15505          | 41/16473          | 52/17191          | 61/17143          |         |
| 45 - 49 years RR (95% CI)      | 1.00                        | 1.07 (0.69, 1.66) | 1.13 (0.74, 1.72) | 1.39 (0.94, 2.05) | 1.25 (0.86, 1.83) | 0.13    |
| Number of cases / Person years | 24/8233                     | 13/5208           | 10/5661           | 22/6056           | 29/5406           |         |
| ≥ 50 years RR (95% CI)         | 1.00                        | 1.10 (0.55, 2.22) | 0.65 (0.30, 1.39) | 1.16 (0.63, 2.13) | 1.68 (0.95, 2.98) | 0.10    |

\*Adjusted for: BMI at age 18, high school total energy, smoking and physical activity, adult physical activity, family history of diabetes, smoking status, postmenopausal hormone use, oral contraceptive use, total energy, alcohol intake. Number of persons: <40 years, N=8765; 40-44 years, N=12,595; 45-49 years, N=11,768, ≥ 50 years, N=3910. p for interaction prudent pattern = 0.89 ; p for interaction Western pattern = 0.43
